# Supplementary material
Source: PubMed Central journal article supplement (PMC5319830)

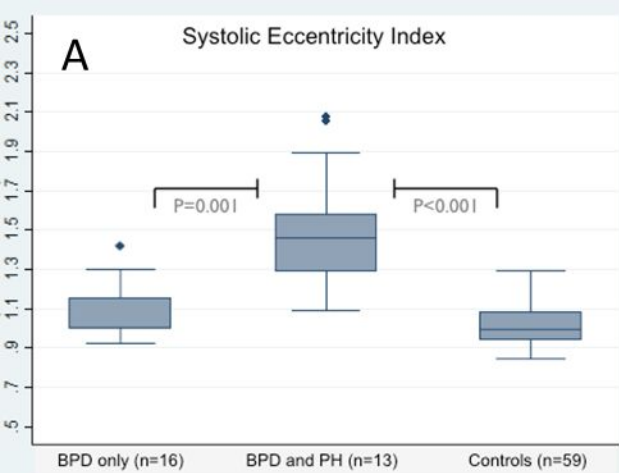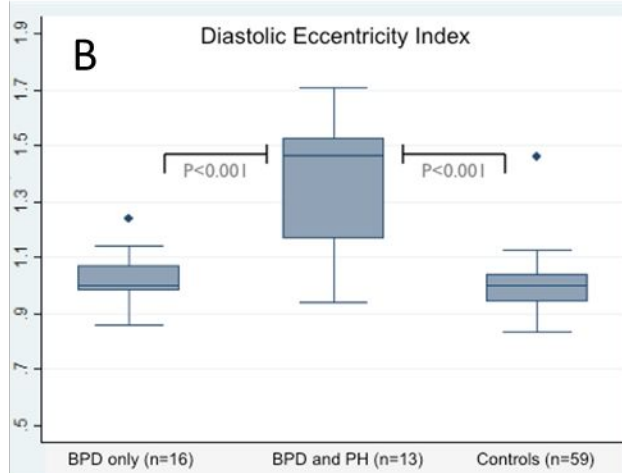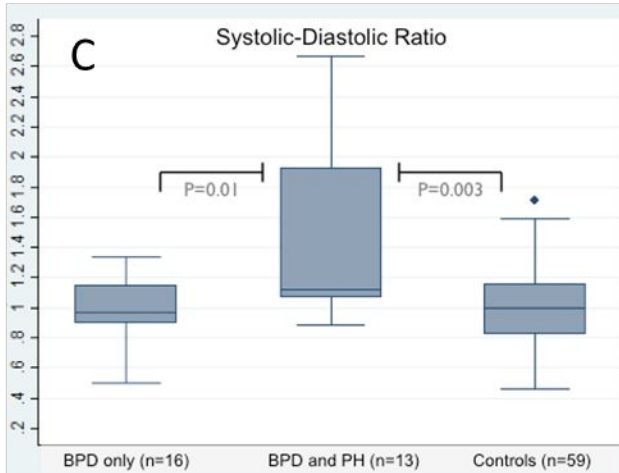

Supplement: NIHMS848246-supplement-Fig_2.pdf [file NIHMS848246-supplement-Fig_2.pdf]
